# Supplementary material
Source: MDPI journal article supplement (https://www.mdpi.com/2673-8023/3/2/38)
Supplement: s1 [file s1 › micro-2299218-supplementary.pdf]

## Supplementary information

### Pressure-driven sample flow through an electrospun membrane increases the analyte adsorption

In the experiments with BSA adsorption, we used the BSA-Cy3 conjugates as the analyte and relied on the Cy3 fluorescence to measure the concentration. A calibration curve was obtained in every experiment, and a typical calibration curve is shown in **Figure S1**

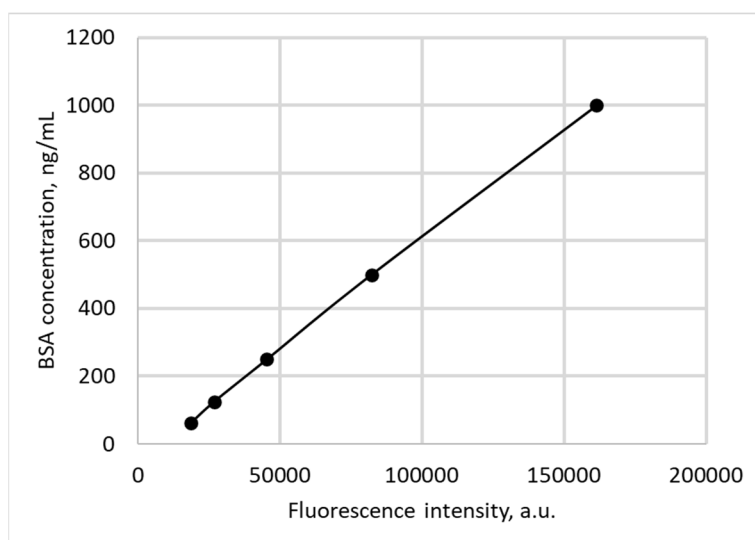

Figure S1 - A typical calibration curve obtained in the experiment on the adsorption of BSA onto the PDO membranes.

Table S1 - The list of peaks in the FTIR spectrum of PDO

| Wave number (cm <sup>-1</sup> ) | Identification of peaks                           |
|---------------------------------|---------------------------------------------------|
| 3400 - 3700                     | O–H stretching vibrations                         |
| 2959                            |                                                   |
| 2923                            | stretching vibrations in –CH <sub>2</sub> – group |
| 2880                            |                                                   |
| 1734                            | C=O stretching vibration                          |
| 1431                            | bending vibration of –CH <sub>2</sub> – group     |
| 1269                            |                                                   |
| 1051                            | C–O stretching vibrations                         |
| 1201                            |                                                   |
| 1127                            | C–O–C asymmetric stretching vibrations            |
| 1069                            |                                                   |
| 930                             |                                                   |
| 873                             | C–O–C symmetric stretching vibrations             |

|                              |                                          |
|------------------------------|------------------------------------------|
| 850                          |                                          |
| 724                          | plane vibration of $-\text{CH}_2-$ group |
| 1289, 1237, 1003,<br>and 582 | Undefined fingerprints peak              |

The measurements of the BSA concentration upon adsorption yielded data as shown in **Figure S2**. They were used to calculate the fraction of the adsorbed BSA, as described in the main text.

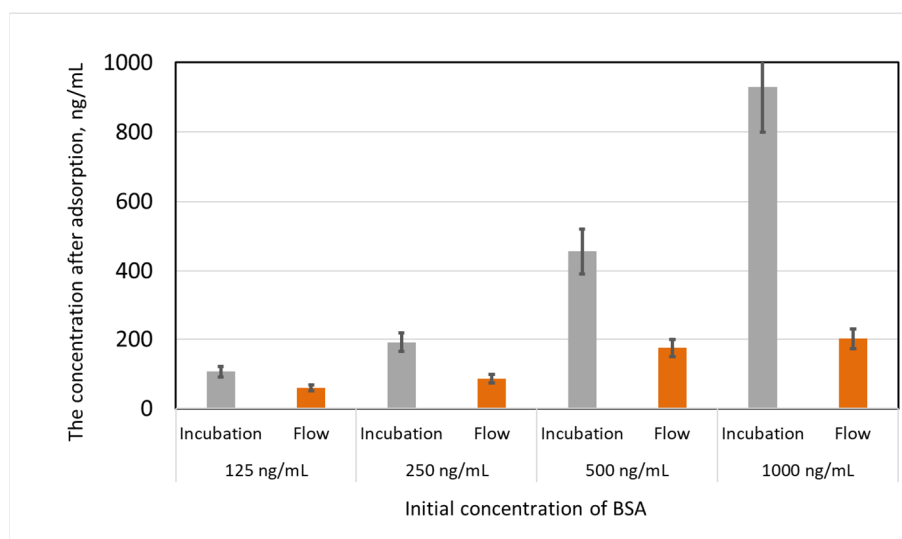

Figure S2 – Concentrations of BSA after the adsorption onto the PDO membranes.

When IL1b concentration was measured, we used conventional ELISA using reagents purchased from Cloud-Clone (China). A typical calibration curve obtained in such an experiment is shown in **Figure S3**.

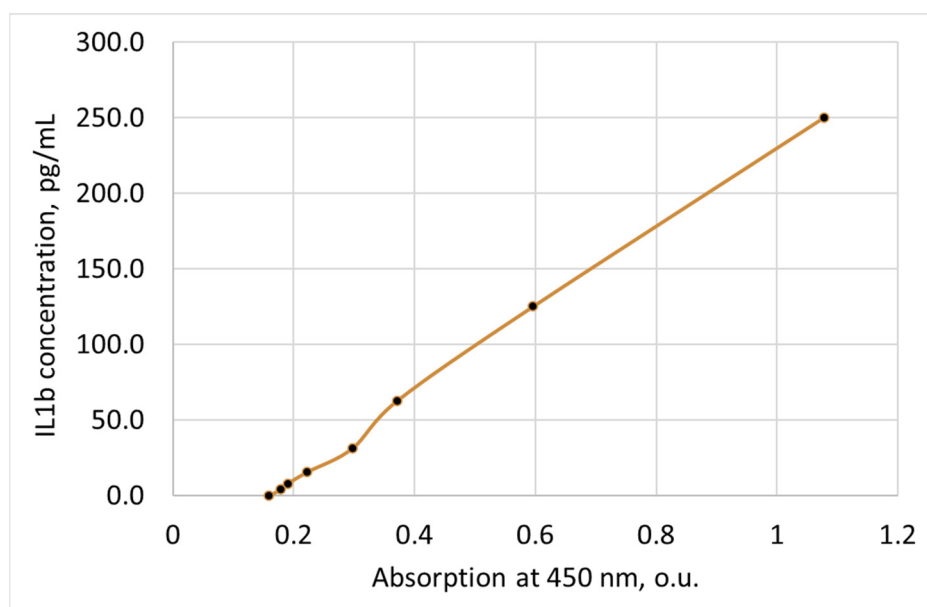

Figure S3 - A typical calibration curve used to measure the concentration of IL1b after the adsorption.
